# Supplementary material for: Smartphone-based handheld Raman spectrometer and machine learning for essential oil quality evaluation
Source: Royal Society of Chemistry journal article supplement (doi:10.1039/d1ay00886b), 2021-01-01
Supplement: d1ay00886b1.pdf [file d1ay00886b1.pdf]

Supplementary material

## Application of smartphone-based handheld Raman spectrometer and machine learning for the essential oil evaluation

Leo Lebanov<sup>a,b</sup>, Brett Paull<sup>a,b\*</sup>

<sup>a</sup> *Australian Centre for Research on Separation Science (ACROSS), School of Natural Sciences, University of Tasmania, Hobart, TAS, Australia*

<sup>b</sup> *ARC Industrial Transformation Research Hub for Processing Advanced Lignocellulosics Products (PALs), School of Natural Sciences, University of Tasmania, Hobart, TAS, Australia*

Brett Paull (Corresponding Author); **E-mail:** [brett.paull@utas.edu.au](mailto:brett.paull@utas.edu.au)

**Full postal address:** *School of Natural Sciences, Private Bag 75, University of Tasmania, Hobart, TAS 7001, Australia*

**Tel.-Fax:** +61 3 6226 6680

**ORCID:** <https://orcid.org/0000-0001-6373-658>

**Table S1.** Performance of RF model based on out-of-bag error (OOBE) for different preprocessing approaches for discrimination of pure EOs and adulterated with BA

|         | OOBE (%) |
|---------|----------|
| Raw     | 2.78     |
| MSC     | 2.78     |
| MSC+SG1 | 2.78     |

**Table S2.** Performance of PLS-DA models based on different preprocessing approaches for discrimination of pure EOs and adulterated with BA

|      |     | Raw (5 LVs) |             |          | MSC (3 LVs) |             |          | MSC 1 <sup>st</sup> Ord (6 LVs) |             |          |
|------|-----|-------------|-------------|----------|-------------|-------------|----------|---------------------------------|-------------|----------|
|      |     | Specificity | Sensitivity | Accuracy | Specificity | Sensitivity | Accuracy | Specificity                     | Sensitivity | Accuracy |
| BA   | Cal | 0.750       | 0.958       | 0.889    | 0.750       | 0.917       | 0.861    | 0.917                           | 0.875       | 0.889    |
|      | CV  | 0.750       | 0.833       | 0.806    | 0.750       | 0.875       | 0.833    | 0.833                           | 0.833       | 0.833    |
| Pure | Cal | 0.958       | 0.750       | 0.889    | 0.917       | 0.750       | 0.861    | 0.875                           | 0.917       | 0.889    |
|      | CV  | 0.833       | 0.750       | 0.806    | 0.875       | 0.750       | 0.833    | 0.833                           | 0.833       | 0.833    |

**Table S3.** Performance of individual PLS models for BA quantification

|           |         | RECV | RMSECV | REP  | RMSEP |
|-----------|---------|------|--------|------|-------|
| Cinnamon  | Raw     | 4.64 | 1.69   | 2.88 | 1.04  |
|           | MSC     | 4.13 | 1.50   | 2.80 | 1.01  |
|           | MSC+SG1 | 3.10 | 1.13   | 2.41 | 0.87  |
| Clove bud | Raw     | 12.8 | 4.66   | 9.76 | 3.51  |
|           | MSC     | 7.89 | 2.87   | 6.52 | 2.34  |
|           | MSC+SG1 | 4.76 | 1.73   | 4.09 | 1.47  |
| Geranium  | Raw     | 16.5 | 6.00   | 12.9 | 4.63  |
|           | MSC     | 10.8 | 3.92   | 7.68 | 2.76  |
|           | MSC+SG1 | 7.22 | 2.63   | 6.40 | 2.30  |
| Rosemary  | Raw     | 7.72 | 2.81   | 6.30 | 2.26  |
|           | MSC     | 2.99 | 1.09   | 4.81 | 1.73  |
|           | MSC+SG1 | 3.29 | 1.20   | 2.76 | 0.99  |

**Table S4.** Performance of PLS models for vegetable oil quantification

|  |         | RECV | RMSECV | REP  | RMSEP |
|--|---------|------|--------|------|-------|
|  | Raw     | 4.25 | 1.55   | 4.39 | 1.58  |
|  | MSC     | 6.03 | 2.19   | 4.58 | 1.65  |
|  | MSC+SG1 | 5.20 | 1.89   | 4.94 | 1.77  |

**Table S5.** Performance of RF model based on out-of-bag error (OOBE) for different preprocessing approaches for discrimination of pure YY EOs and adulterated with benzyl alcohol, vegetable oil and lower price EO

|         | OOBE (%) |
|---------|----------|
| Raw     | 0.00     |
| MSC     | 3.45     |
| MSC+SG1 | 3.45     |

**Table S6.** Performance of PLS-DA models based on different preprocessing approaches for discrimination of pure YY EOs and adulterated with BA, VO and EO

|         |     | Raw (7 LVs) |             |          | MSC (6 LVs) |             |          | MSC 1 <sup>st</sup> | 8 LVs |      |
|---------|-----|-------------|-------------|----------|-------------|-------------|----------|---------------------|-------|------|
|         |     | Specificity | Sensitivity | Accuracy | Specificity | Sensitivity | Accuracy | Ord                 |       |      |
| YY BA   | Cal | 1           | 1           | 1        | 1.000       | 0.833       | 0.96     | 1                   | 1     | 1    |
|         | CV  | 1           | 1           | 1        | 1           | 0.667       | 0.92     | 1                   | 1     | 1    |
| YY EO   | Cal | 1           | 1           | 1        | 1           | 1           | 1        | 1                   | 1     | 1    |
|         | CV  | 0.947       | 1           | 0.960    | 1           | 1           | 1        | 0.947               | 1     | 0.96 |
| YY VO   | Cal | 1           | 1           | 1        | 1           | 1           | 1        | 1                   | 1     | 1    |
|         | CV  | 1           | 1           | 1        | 0.947       | 1           | 0.96     | 1                   | 1     | 1    |
| YY Pure | Cal | 1           | 1           | 1        | 1           | 1           | 1        | 1                   | 1     | 1    |
|         | CV  | 1           | 0.857       | 0.966    | 1           | 0.571       | 0.88     | 1                   | 0.714 | 0.92 |

**Table S7.** Performance of PLS models for quantification of BA, VO and cypress EO as adulterants (updated)

|       |         | RECV  | RMSECV | REP   | RMSEP |
|-------|---------|-------|--------|-------|-------|
| YY BA | Raw     | 10.26 | 3.85   | 11.36 | 4.19  |
|       | MSC     | 4.94  | 1.80   | 7.59  | 2.73  |
|       | MSC+SG1 | 9.62  | 3.50   | 9.15  | 2.75  |
| YY VO | Raw     | 9.34  | 3.51   | 3.80  | 1.40  |
|       | MSC     | 4.31  | 1.57   | 3.37  | 1.21  |
|       | MSC+SG1 | 7.38  | 2.77   | 5.43  | 1.63  |
| YY EO | Raw     | 8.41  | 3.16   | 6.33  | 2.33  |
|       | MSC     | 2.82  | 1.17   | 4.41  | 1.83  |
|       | MSC+SG1 | 6.78  | 2.55   | 5.39  | 1.99  |

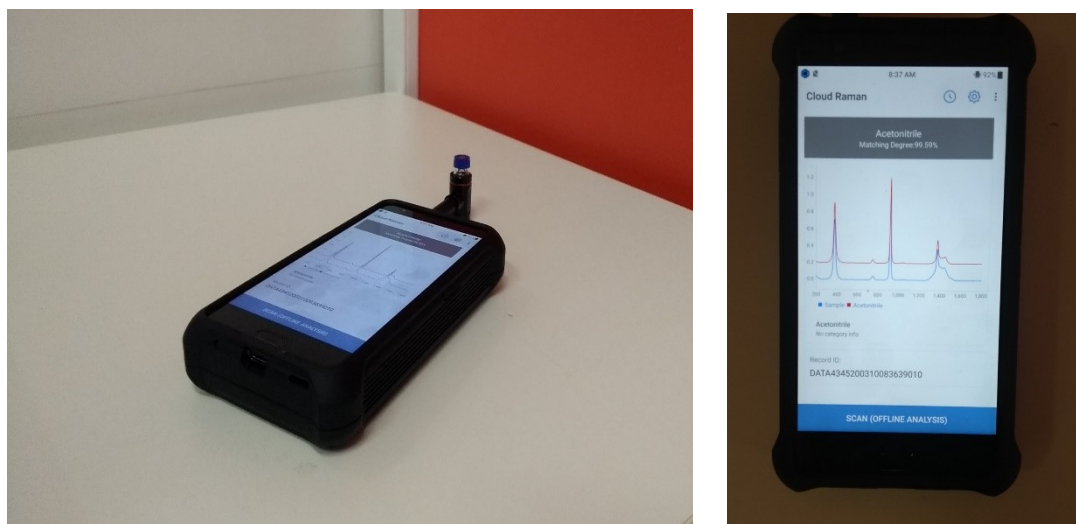

**Fig. S1.** Image of the Smart Raman XI<sup>TM</sup> with liquid vial holder

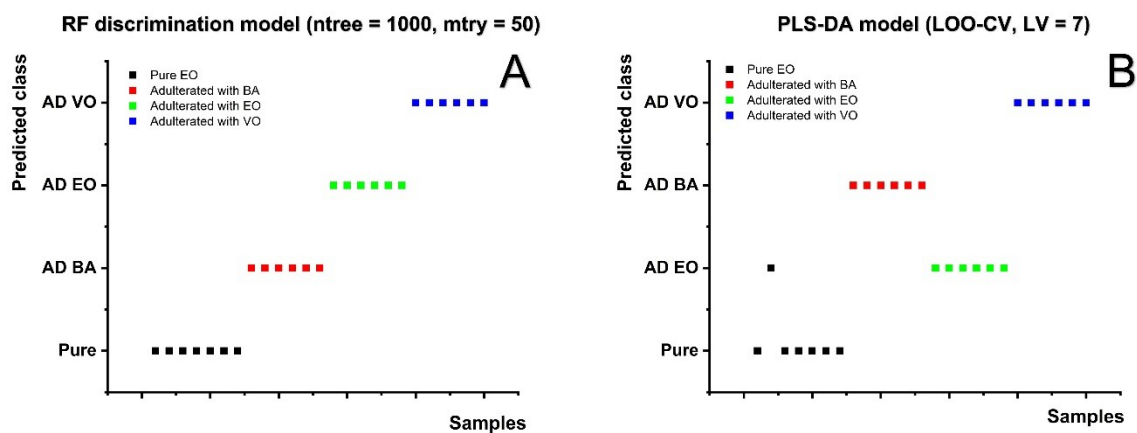

**Fig. S2.** Prediction performance of (A) Random Forest and (B) PLS-DA models in the cross-validation procedure for the discrimination of pure from adulterated ylang-ylang essential oils and identification of adulterant

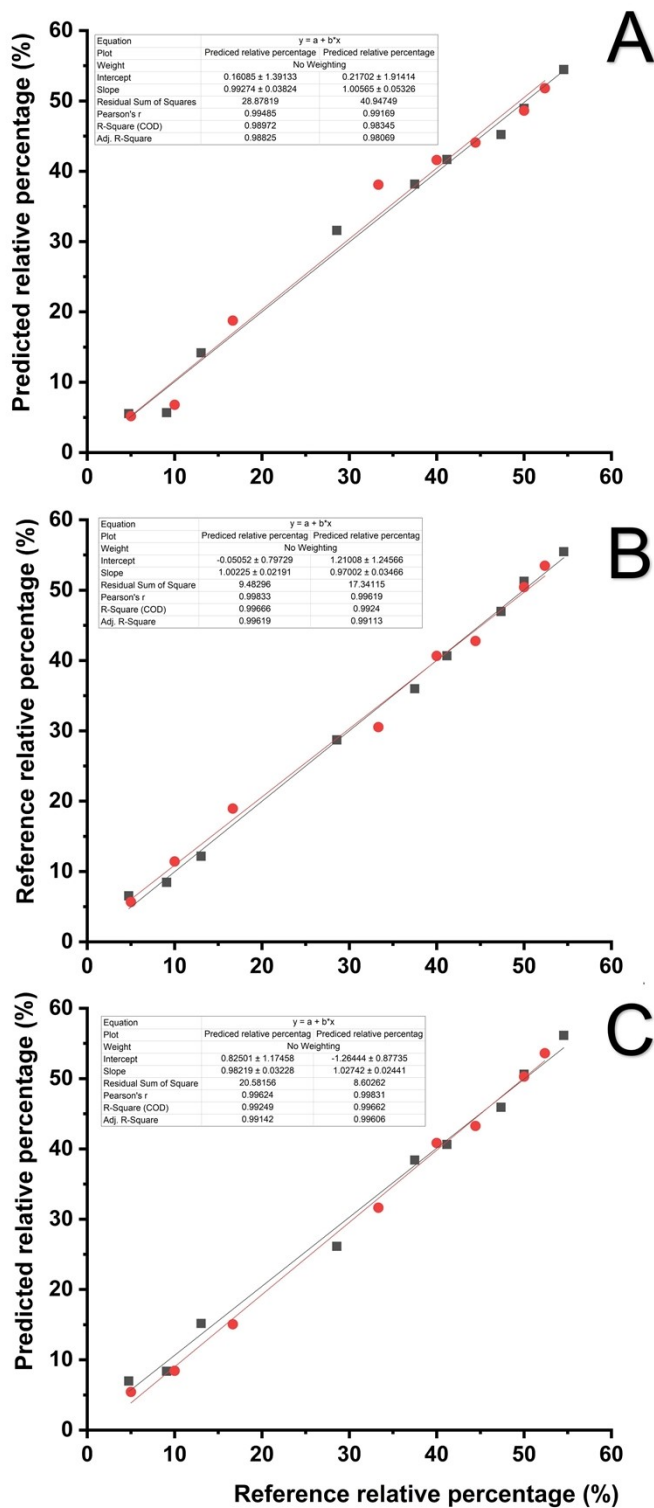

Fig. S3. Predicted relative percentage in the cross-validation (CV) (black square) and in independent test set (double cross validation (DCV)) (red circle) vs reference relative percentage for the quantification of (A) benzyl alcohol (BA), (B) cheaper essential oil (EO) and (C) vegetable oil (VO) in ylang-ylang EOs
